# Supplementary material
Source: Research Square preprint supplement (doi:10.21203/rs.3.rs-9568196/v1)
Supplement: Supplementary file 1 [file ef89c5fde252a3240d15b1b7.docx]

Table S1. Estradiol concentration (pg/ml) in *Salamandrina perspicillata* female urine throughout the sampled months. ID codes starting with “VJ” refer to Vejo population while ID codes starting with “GR” refer to Guardiaregia population. CV (%) = percentage of variation coefficient.

| ID | 1st measure (pc/ml) | 2nd measure (pc/ml) | Estradiol (pc/ml) (geometric mean) | CV (%) | Month and Year |
| --- | --- | --- | --- | --- | --- |
| VJ114 | 72.818 | 57.757 | 64.852 | 16.45 | October 2008 |
| VJ115 | 56.005 | 81.056 | 67.376 | 26.40 | October 2008 |
| VJ119 | 119.845 | 100.064 | 109.509 | 12.79 | October 2008 |
| VJ120 | 69.667 | 67.231 | 68.438 | 2.52 | October 2008 |
| VJ121§ | 93.471 | - | 93.471 | - | October 2008 |
| VJ127 | 44.708 | 57.820 | 50.843 | 18.27 | October 2008 |
| VJ128 | 97.075 | 91.146 | 94.064 | 4.46 | October 2008 |
| VJ133 | 79.810 | 78.440 | 79.122 | 1.22 | October 2008 |
| VJ140 | 120.826 | 94.453 | 106.829 | 17.49 | October 2008 |
| VJ142 | 84.769 | 89.996 | 87.343 | 4.23 | October 2008 |
| VJ143 | 87.343 | 90.367 | 88.842 | 2.41 | October 2008 |
| VJ144 | 89.220 | 64.598 | 75.917 | 23.01 | October 2008 |
| VJ110 | 71.229 | 94.589 | 82.082 | 20.17 | October 2008 |
| VJ003 | 70.412 | 55.059 | 62.264 | 17.47 | November 2008 |
| VJ004 | 46.034 | 39.467 | 42.624 | 10.90 | November 2008 |
| VJ005 | 60.271 | 55.740 | 57.961 | 5.53 | November 2008 |
| VJ006 | 76.524 | 63.243 | 69.567 | 13.51 | November 2008 |
| VJ009 | 40.228 | 34.866 | 37.451 | 10.13 | November 2008 |
| VJ001 | 50.731 | 38.456 | 44.169 | 19.70 | November 2008 |
| VJ004* | 143.140 | 114.111 | 127.804 | 16.09 | January 2009 |
| VJ145 | 152.959 | 191.442 | 171.122 | 15.93 | January 2009 |
| VJ146§ | 214.138 | - | 214.138 | - | January 2009 |
| VJ147§ | 75.306 | - | 75.306 | - | January 2009 |
| VJ148§ | 122.580 | - | 122.580 | - | January 2009 |
| VJ150 | 192.721 | 128.714 | 157.499 | 28.88 | January 2009 |
| VJ171 | 350.918 | 286.724 | 317.201 | 14.33 | January 2009 |
| VJ149§ | 10.734 | - | 10.734 | - | February 2009 |
| VJ002 | 90.155 | 78.838 | 84.307 | 9.50 | February 2009 |
| VJ010 | 64.720 | 50.222 | 57.012 | 18.02 | February 2009 |
| VJ058 | 35.148 | 31.283 | 33.159 | 8.25 | February 2009 |
| VJ076 | 95.211 | 77.678 | 85.999 | 14.43 | February 2009 |
| VJ087 | 16.820 | 14.157 | 15.431 | 12.21 | February 2009 |
| VJ093 | 28.355 | 24.766 | 26.500 | 9.58 | February 2009 |
| GR1 | 111.328 | 107.879 | 109.590 | 2.23 | May 2009 |
| GR24 | 58.123 | 72.688 | 64.999 | 15.87 | May 2009 |
| GR25 | 92.295 | 83.362 | 87.715 | 7.20 | May 2009 |
| GR27 | 11.890 | 18.397 | 14.790 | 31.29 | May 2009 |
| GR41 | 46.273 | 55.334 | 50.601 | 12.67 | May 2009 |
| GR43§ | 79.465 | - | 79.465 | - | May 2009 |
| GR47 | 67.527 | 102.383 | 83.148 | 29.80 | May 2009 |
| GR53 | 14.368 | 10.805 | 12.460 | 20.27 | May 2009 |
| GR55 | 184.645 | 133.935 | 157.259 | 22.87 | May 2009 |
| GR56 | 47.184 | 67.096 | 56.266 | 25.12 | May 2009 |
| GR35 | 129.983 | 152.099 | 140.607 | 11.13 | May 2009 |

§ = *females whose available urine volume was insufficient to perform duplicate assays*

Table S2. Oestradiol concentration (pg/ml) in *Salamandrina perspicillata* female urine. ID: unique identification code for *S. perspicillata* tested females.

| ID | Oestradiol (pc/ml) |
| --- | --- |
| VJ002 | 84 |
| VJ004 | 43 |
| VJ006 | 70 |
| VJ010 | 57 |
| VJ076 | 86 |
| VJ004* | 128 |
| VJ119 | 110 |
| VJ120 | 68 |
| VJ093 | 27 |
| VJ005 | 58 |

Table S3. Results of Dunn’s post-hoc pairwise comparisons following the Kruskal–Wallis test, assessing monthly differences in oestradiol concentration in *Salamandrina* *perspicillata.* For each comparison, the standardized test statistic (*z*), rank-biserial correlation (*rrb*) as a measure of effect size, and *p*-values (*p*) are reported. Significant *p* values indicate months differing in oestradiol concentrations.

| Comparison | z | rrb | p |
| --- | --- | --- | --- |
| October - November | 2.108 | -0.846 | **0.035** |
| October - January | -1.953 | 0.769 | 0.051 |
| October - February | 2.248 | -0.670 | **0.025** |
| October - May | 0.716 | -0.119 | 0.474 |
| November - January | -3.471 | 1.000 | **<0.001** |
| November - February | 0.024 | -0.286 | 0.981 |
| November - May | -1.472 | 0.424 | 0.141 |
| January - February | 3.626 | -0.905 | **<0.001** |
| January - May | 2.477 | -0.758 | **0.013** |
| February - May | -1.572 | 0.377 | 0.116 |

Table S4: Results of Experiment 1 in which each male was exposed to female VJ002 chemical cues. L and R indicate the left and right arms of the Y maze, respectively. SCC indicates the presence of the scent chemical cue in the maze arm, whereas C indicates the control condition (no scent). The score increases by one unit for each observed SCC.

| Individual ID | Trial | | | | Score |
| --- | --- | --- | --- | --- | --- |
| 1 | 2 | 3 | 4 |
| VJ 055 | R SCC | R SCC | L SCC | R C | 3 |
| VJ 064 | R SCC | R SCC | R C | R C | 2 |
| VJ 072 | R SCC | R C | R SCC | R C | 2 |
| VJ 080 | R SCC | L SCC | R SCC | R C | 3 |
| VJ 059 | R SCC | R SCC | L SCC | R C | 3 |
| VJ 067 | R C | L SCC | R SCC | R C | 2 |
| VJ 075 | L C | R C | L C | R C | 0 |
| VJ 083 | L SCC | R C | L C | L C | 1 |
| VJ 061 | R C | L C | L C | L SCC | 1 |
| VJ 069 | L C | L SCC | L C | L SCC | 2 |
| VJ 077 | L C | R SCC | R C | L SCC | 2 |
| VJ 085 | L C | R SCC | L SCC | L SCC | 3 |
| VJ 062 | R C | L C | L SCC | R SCC | 2 |
| VJ 070 | L C | L C | R C | R C | 0 |
| VJ 078 | L SCC | R SCC | R C | L C | 2 |
| VJ 086 | R C | L C | L SCC | R SCC | 2 |
| VJ 056 | L SCC | L C | R C | R SCC | 2 |
| VJ 065 | L SCC | R SCC | L SCC | R SCC | 4 |
| VJ 073 | L C | L SCC | L C | L SCC | 2 |
| VJ 081 | L SCC | L SCC | R SCC | R SCC | 4 |
| VJ 089 | L C | R C | L C | R C | 0 |
| VJ 057 | L C | L SCC | L C | L SCC | 2 |

Table S5: Results of Experiment 1 in which each male was exposed to female VJ004 chemical cues. L and R indicate the left and right arms of the Y maze, respectively. SCC indicates the presence of the scent chemical cue in the maze arm, whereas C indicates the control condition (no scent). The score increases by one unit for each observed SCC.

| Individual ID | Trial | | | | Score |
| --- | --- | --- | --- | --- | --- |
| 1 | 2 | 3 | 4 |
| VJ 007 | L SCC | R SCC | L SCC | L C | 3 |
| VJ 015 | R SCC | L SCC | R SCC | L SCC | 4 |
| VJ 023 | R SCC | R C | R SCC | R C | 2 |
| VJ 031 | R SCC | L SCC | R SCC | R C | 3 |
| VJ 039 | L C | L SCC | R SCC | R C | 2 |
| VJ 047 | R SCC | L SCC | L SCC | R SCC | 4 |
| VJ 008 | R C | R SCC | L SCC | L C | 2 |
| VJ 016 | R SCC | R SCC | L SCC | L SCC | 4 |
| VJ 024 | L SCC | L C | R C | R SCC | 2 |
| VJ 032 | L C | R C | R SCC | L SCC | 2 |
| VJ 040 | R C | R SCC | L SCC | L C | 2 |
| VJ 048 | L SCC | R SCC | R C | R SCC | 3 |
| VJ 011 | L SCC | L C | R C | R SCC | 2 |
| VJ 019 | R SCC | R C | L C | L SCC | 2 |
| VJ 027 | R SCC | L SCC | R SCC | L SCC | 4 |
| VJ 035 | R SCC | L SCC | R SCC | R C | 3 |
| VJ 043 | L SCC | L SCC | R SCC | R SCC | 4 |
| VJ 051 | R C | L C | L SCC | R SCC | 2 |
| VJ 012 | L SCC | R SCC | L SCC | R SCC | 4 |
| VJ 020 | R SCC | L SCC | R SCC | L SCC | 4 |
| VJ 028 | R SCC | R SCC | L SCC | L SCC | 4 |
| VJ 036 | L SCC | R SCC | L SCC | R SCC | 4 |

Table S6: Results of Experiment 1 in which each male was exposed to female VJ006 chemical cues. L and R indicate the left and right arms of the Y maze, respectively. SCC indicates the presence of the scent chemical cue in the maze arm, whereas C indicates the control condition (no scent). The score increases by one unit for each observed SCC.

| Individual ID | Trial | | | | Score |
| --- | --- | --- | --- | --- | --- |
| 1 | 2 | 3 | 4 |
| VJ 044 | R SCC | L SCC | L C | L SCC | 3 |
| VJ 052 | L SCC | L C | R C | R SCC | 2 |
| VJ 013 | L SCC | R SCC | R C | R SCC | 3 |
| VJ 021 | L SCC | L C | R C | R SCC | 2 |
| VJ 029 | L C | R C | R SCC | L SCC | 2 |
| VJ 037 | L C | R C | R SCC | R C | 1 |
| VJ 045 | L SCC | L C | R C | R SCC | 2 |
| VJ 053 | R SCC | L SCC | L C | L SCC | 3 |
| VJ 014 | L SCC | R SCC | L SCC | R SCC | 4 |
| VJ 022 | R SCC | R C | R SCC | R C | 2 |
| VJ 030 | L C | R C | L C | R C | 0 |
| VJ 038 | L SCC | L C | R C | R SCC | 2 |
| VJ 046 | R SCC | L SCC | R SCC | R C | 3 |
| VJ 007 | R SCC | R C | R SCC | R C | 2 |
| VJ 015 | L SCC | R SCC | L SCC | L C | 3 |
| VJ 023 | R SCC | R C | R SCC | R C | 2 |
| VJ 031 | L C | L SCC | L C | R C | 1 |
| VJ 039 | R C | L C | R C | R SCC | 1 |
| VJ 008 | L C | L SCC | R SCC | R C | 2 |
| VJ 016 | R C | L SCC | R SCC | R SCC | 3 |
| VJ 024 | L SCC | L C | R C | R SCC | 2 |
| VJ 032 | R SCC | R C | R SCC | L SCC | 3 |

Table S7: Results of Experiment 1 in which each male was exposed to female VJ010 chemical cues. L and R indicate the left and right arms of the Y maze, respectively. SCC indicates the presence of the scent chemical cue in the maze arm, whereas C indicates the control condition (no scent). The score increases by one unit for each observed SCC.

| Individual ID | Trial | | | | Score |
| --- | --- | --- | --- | --- | --- |
| 1 | 2 | 3 | 4 |
| VJ 060 | L SCC | R SCC | R C | R SCC | 3 |
| VJ 068 | R C | R SCC | L SCC | R SCC | 3 |
| VJ 066 | R C | R SCC | L SCC | L C | 2 |
| VJ 074 | R C | L C | L C | L SCC | 1 |
| VJ 082 | L SCC | L C | L SCC | R C | 2 |
| VJ 063 | R SCC | L SCC | R SCC | L SCC | 4 |
| VJ 071 | R SCC | R C | R SCC | R C | 2 |
| VJ 079 | L C | R C | R SCC | R C | 1 |
| VJ 056 | L SCC | R SCC | L SCC | R SCC | 4 |
| VJ 064 | L SCC | R SCC | L SCC | L C | 3 |
| VJ 072 | L C | R C | L C | R C | 0 |
| VJ 080 | L SCC | R SCC | R C | R SCC | 3 |
| VJ 061 | L C | L SCC | R SCC | R C | 2 |
| VJ 069 | R C | R SCC | L SCC | R SCC | 3 |
| VJ 077 | L SCC | R SCC | R C | L C | 2 |
| VJ 085 | R C | R C | L C | L C | 0 |
| VJ 062 | R SCC | R C | R SCC | L SCC | 3 |
| VJ 070 | L SCC | R SCC | L SCC | R SCC | 4 |
| VJ 078 | R SCC | L SCC | L SCC | R SCC | 4 |
| VJ 086 | R SCC | R C | R SCC | R C | 2 |
| VJ 057 | L SCC | L C | L SCC | L C | 2 |
| VJ 065 | L SCC | R SCC | L SCC | L C | 3 |

Table S8: Results of Experiment 1 in which each male was exposed to female VJ076 chemical cues. L and R indicate the left and right arms of the Y maze, respectively. SCC indicates the presence of the scent chemical cue in the maze arm, whereas C indicates the control condition (no scent). The score increases by one unit for each observed SCC.

| Individual ID | Trial | | | | Score |
| --- | --- | --- | --- | --- | --- |
| 1 | 2 | 3 | 4 |
| VJ 073 | R SCC | R C | R SCC | L SCC | 3 |
| VJ 081 | R SCC | R C | R SCC | R C | 2 |
| VJ 089 | R C | L C | L SCC | R SCC | 2 |
| VJ 055 | R SCC | R C | R SCC | R C | 2 |
| VJ 063 | L C | L SCC | L C | L SCC | 2 |
| VJ 071 | R SCC | R C | L SCC | R SCC | 3 |
| VJ 079 | L C | R C | R SCC | L SCC | 2 |
| VJ 056 | R SCC | R C | L C | L SCC | 2 |
| VJ 064 | R SCC | R C | R SCC | R C | 2 |
| VJ 072 | L C | R C | L C | L SCC | 1 |
| VJ 080 | L SCC | L C | R C | R SCC | 2 |
| VJ 059 | R C | R SCC | L SCC | L C | 2 |
| VJ 067 | R C | L C | R C | R SCC | 1 |
| VJ 075 | L SCC | R SCC | L SCC | R SCC | 4 |
| VJ 083 | R C | R SCC | R C | R SCC | 2 |
| VJ 061 | R SCC | R C | R SCC | R C | 2 |
| VJ 069 | L SCC | R SCC | R C | L C | 2 |
| VJ 077 | R C | R SCC | R C | R SCC | 2 |
| VJ 085 | R SCC | R C | R SCC | L SCC | 3 |
| VJ 062 | R C | L C | L SCC | R SCC | 2 |
| VJ 070 | R SCC | R C | R SCC | L SCC | 3 |
| VJ 078 | L C | L SCC | R SCC | R C | 2 |

Table S9: Results of Experiment 1 in which each male was exposed to female VJ004* chemical cues. L and R indicate the left and right arms of the Y maze, respectively. SCC indicates the presence of the scent chemical cue in the maze arm, whereas C indicates the control condition (no scent). The score increases by one unit for each observed SCC.

| Individual ID | Trial | | | | Score |
| --- | --- | --- | --- | --- | --- |
| 1 | 2 | 3 | 4 |
| VJ 176 | R C | L C | R C | L C | 0 |
| VJ 169 | R SCC | R C | R SCC | L SCC | 3 |
| VJ 157 | R SCC | R C | L C | L SCC | 2 |
| VJ 188 | R C | R SCC | R C | R SCC | 2 |
| VJ 151 | R C | L C | L SCC | R SCC | 2 |
| VJ 161 | R C | L C | R C | L C | 0 |
| VJ 155 | L C | R C | L C | R C | 0 |
| VJ 149 | R C | L C | L SCC | R SCC | 2 |
| VJ 190 | R SCC | R C | R SCC | R C | 2 |
| VJ 184 | R SCC | R C | L C | L SCC | 2 |
| VJ 192 | L SCC | R SCC | L SCC | L C | 3 |
| VJ 174 | L C | R C | L C | R C | 0 |
| VJ 186 | L C | L SCC | L C | R C | 1 |
| VJ 165 | L C | R C | L C | R C | 0 |
| VJ 180 | L C | R C | L C | L SCC | 1 |
| VJ 167 | R SCC | R C | R SCC | R C | 2 |
| VJ 178 | R C | L C | L SCC | L C | 1 |
| VJ 163 | R C | R SCC | L SCC | R SCC | 3 |
| VJ 172 | R SCC | R C | R SCC | R C | 2 |
| VJ 182 | L SCC | R SCC | L SCC | L C | 3 |
| VJ 159 | L C | L SCC | L C | R C | 1 |
| VJ 153 | R C | R SCC | L SCC | R SCC | 3 |

Table S10: Results of Experiment 1 in which each male was exposed to female VJ119 chemical cues. L and R indicate the left and right arms of the Y maze, respectively. SCC indicates the presence of the scent chemical cue in the maze arm, whereas C indicates the control condition (no scent). The score increases by one unit for each observed SCC.

| Individual ID | Trial | | | | Score |
| --- | --- | --- | --- | --- | --- |
| 1 | 2 | 3 | 4 |
| VJ 135 | R SCC | R C | R SCC | L SCC | 3 |
| VJ 118 | R C | L C | L SCC | L C | 1 |
| VJ 124 | R SCC | R C | R SCC | R C | 2 |
| VJ 131 | L SCC | R SCC | L SCC | R SCC | 4 |
| VJ 137 | R SCC | L SCC | R SCC | R C | 3 |
| VJ 103 | R C | L C | L SCC | R SCC | 2 |
| VJ 141 | L C | R C | L C | L SCC | 1 |
| VJ 104 | R C | L C | R C | R SCC | 1 |
| VJ 112 | R SCC | R C | R SCC | R C | 2 |
| VJ 105 | L SCC | R SCC | L SCC | L C | 3 |
| VJ 107 | L C | L SCC | L C | L SCC | 2 |
| VJ 129 | L SCC | L C | R C | L C | 1 |
| VJ 139 | L C | R C | L C | L SCC | 1 |
| VJ 122 | L SCC | R SCC | R C | L C | 2 |
| VJ 100 | L C | L SCC | R SCC | R C | 2 |
| VJ 099 | R C | L C | L SCC | L C | 1 |
| VJ 102 | L C | R C | L C | R C | 0 |
| VJ 106 | L SCC | L C | R C | R SCC | 2 |
| VJ 126 | L C | R C | R SCC | R C | 1 |
| VJ 101 | R C | L C | L SCC | R SCC | 2 |
| VJ 109 | L C | R C | R SCC | R C | 1 |
| VJ 116 | R C | L C | R C | R SCC | 1 |

Table S11: Results of Experiment 1 in which each male was exposed to female VJ120 chemical cues. L and R indicate the left and right arms of the Y maze, respectively. SCC indicates the presence of the scent chemical cue in the maze arm, whereas C indicates the control condition (no scent). The score increases by one unit for each observed SCC.

| Individual ID | Trial | | | | Score |
| --- | --- | --- | --- | --- | --- |
| 1 | 2 | 3 | 4 |
| VJ 111 | R C | R SCC | L SCC | R SCC | 3 |
| VJ 132 | R SCC | R C | R SCC | R C | 2 |
| VJ 130 | R C | R SCC | L SCC | R SCC | 3 |
| VJ 117 | L C | L SCC | L C | R C | 1 |
| VJ 116 | L SCC | L C | L SCC | R C | 2 |
| VJ 126 | R SCC | R C | L C | L SCC | 2 |
| VJ 138 | L SCC | R SCC | L SCC | R SCC | 4 |
| VJ 109 | L C | R C | R SCC | R C | 1 |
| VJ 136 | R C | R SCC | R C | R SCC | 2 |
| VJ 105 | L C | R C | L C | R C | 0 |
| VJ 103 | L SCC | R SCC | R C | R SCC | 3 |
| VJ 122 | R SCC | L SCC | L C | L SCC | 3 |
| VJ 134 | L SCC | R SCC | L SCC | L C | 3 |
| VJ 118 | R SCC | R C | L C | L SCC | 2 |
| VJ 124 | L SCC | R SCC | L SCC | L C | 3 |
| VJ 107 | R SCC | R C | R SCC | L SCC | 3 |
| VJ 108 | R C | R SCC | L SCC | L C | 2 |
| VJ 125 | R SCC | R C | R SCC | R C | 2 |
| VJ 123 | L SCC | L C | L SCC | L C | 2 |
| VJ 113 | R SCC | R C | R SCC | L SCC | 3 |
| VJ 101 | R C | R SCC | L SCC | L C | 2 |
| VJ 112 | R SCC | L SCC | R SCC | L SCC | 4 |

Table S12: Results of Experiment 1 in which each male was exposed to female VJ093 chemical cues. L and R indicate the left and right arms of the Y maze, respectively. SCC indicates the presence of the scent chemical cue in the maze arm, whereas C indicates the control condition (no scent). The score increases by one unit for each observed SCC.

| Individual ID | Trial | | | | Score |
| --- | --- | --- | --- | --- | --- |
| 1 | 2 | 3 | 4 |
| VJ 086 | R SCC | R C | R SCC | R C | 2 |
| VJ 057 | R C | L C | L SCC | L C | 1 |
| VJ 065 | L C | R C | R SCC | R C | 1 |
| VJ 073 | R C | R SCC | R C | R SCC | 2 |
| VJ 081 | L C | R C | R SCC | R C | 1 |
| VJ 089 | L SCC | R SCC | R C | L C | 2 |
| VJ 055 | L C | L SCC | R SCC | R C | 2 |
| VJ 063 | R C | L C | L SCC | R SCC | 2 |
| VJ 071 | R SCC | R C | R SCC | L SCC | 3 |
| VJ 079 | L SCC | R SCC | L SCC | R SCC | 4 |
| VJ 092 | R SCC | L SCC | R SCC | R C | 3 |
| VJ 056 | L SCC | R SCC | R C | R SCC | 3 |
| VJ 064 | L C | R C | L C | L SCC | 1 |
| VJ 072 | R C | R SCC | L SCC | R SCC | 3 |
| VJ 080 | R SCC | R C | R SCC | L SCC | 3 |
| VJ 059 | R C | R SCC | R C | R SCC | 2 |
| VJ 067 | R SCC | L SCC | R SCC | R C | 3 |
| VJ 075 | L SCC | L C | R C | R SCC | 2 |
| VJ 083 | L C | L SCC | R SCC | R C | 2 |
| VJ 061 | R C | L C | L SCC | R SCC | 2 |
| VJ 069 | L C | L SCC | L C | R C | 1 |
| VJ 077 | L SCC | R SCC | L SCC | L C | 3 |

Table S13: Results of Experiment 1 in which each male was exposed to female VJ005 chemical cues. L and R indicate the left and right arms of the Y maze, respectively. SCC indicates the presence of the scent chemical cue in the maze arm, whereas C indicates the control condition (no scent). The score increases by one unit for each observed SCC.

| Individual ID | Trial | | | | Score |
| --- | --- | --- | --- | --- | --- |
| 1 | 2 | 3 | 4 |
| VJ 040 | R C | L C | L SCC | R SCC | 2 |
| VJ 048 | L C | L SCC | R SCC | R C | 2 |
| VJ 011 | R C | R SCC | R C | R SCC | 2 |
| VJ 019 | R SCC | R C | R SCC | R C | 2 |
| VJ 027 | R C | R SCC | R C | R SCC | 2 |
| VJ 035 | L C | R C | L C | R C | 0 |
| VJ 043 | R C | R SCC | L SCC | R SCC | 3 |
| VJ 051 | L C | R C | R SCC | L SCC | 2 |
| VJ 012 | L SCC | L C | L SCC | L C | 2 |
| VJ 020 | R SCC | R C | R SCC | R C | 2 |
| VJ 028 | R C | L C | R C | L C | 0 |
| VJ 036 | L C | L SCC | R SCC | R C | 2 |
| VJ 044 | L SCC | R SCC | R C | R SCC | 3 |
| VJ 052 | L C | R C | L C | R C | 0 |
| VJ 013 | L SCC | L C | R C | R SCC | 2 |
| VJ 021 | L C | R C | R SCC | L SCC | 2 |
| VJ 029 | L SCC | L C | R C | R SCC | 2 |
| VJ 037 | R SCC | R C | L C | L SCC | 2 |
| VJ 045 | R C | R SCC | R C | R SCC | 2 |
| VJ 053 | R SCC | R C | R SCC | R C | 2 |
| VJ 014 | R C | R SCC | L SCC | R SCC | 3 |
| VJ 022 | R SCC | R C | R SCC | R C | 2 |

## Table S14. Fixed effects estimates from the generalized linear mixed-effects model (GLMM) analysing male orientation responses in Experiment 1. The response variable was whether a male entered the arm containing female chemical cues (1) or the control arm (0). Female urinary oestradiol concentration (log-transformed) and trial order were included as fixed effects, and male identity was included as a random intercept to account for repeated measures. The model was fitted with binomial error distribution and logit link. Trial coefficients are reported using sum contrast coding, so the intercept corresponds to the unweighted grand mean.

| **Term** | **Estimate (β)** | **SE** | **t** | **p** |
| --- | --- | --- | --- | --- |
| Intercept | 2.507 | 0.686 | 3.652 | <0.001 |
| LogEstradiol | -1.287 | 0.373 | -3.452 | <0.001 |
| trial (1) | -0.006 | 0.118 | -0.054 | 0.957 |
| trial (2) | -0.283 | 0.118 | -2.400 | 0.016 |
| trial (3) | 0.315 | 0.120 | 2.623 | 0.009 |

## Table S15. Likelihood ratio tests for fixed effects in the generalized linear mixed-effects model (GLMM) analysing male orientation responses in Experiment 1. Results are from a generalized linear mixed-effects model with binomial family and logit link. Male identity was included as a random intercept. Fixed effects were tested using likelihood ratio tests. Model fit statistics: deviance = 1193, log-likelihood = -596.7, df = 6, AIC = 1205, BIC = 1234. The variance associated with the random intercept for male identity was estimated as zero in the final model, indicating that repeated measures contributed negligible additional variance under this parameterization.

| **Effect** | **χ²** | **df** | **p** |
| --- | --- | --- | --- |
| Intercept | 13.692 | 1 | <0.001 |
| LogEstradiol | 12.191 | 1 | <0.001 |
| trial | 9.587 | 3 | 0.022 |

Table S16: Results of Experiment 2 in which each male was exposed to female VJ171 ~~or~~ and VJ149 chemical cues. L and R indicate the left and right arms of the Y maze, respectively. LW indicates the maze arm containing the female chemical cue with low E2 levels, whereas HG indicates the maze arm containing the female chemical cue with high E2 levels. The score increases by one unit for each observed LW.

| Individual ID | Trial | | | | Score |
| --- | --- | --- | --- | --- | --- |
| 1 | 2 | 3 | 4 |
| VJ 157 | L HG | L LW | R LW | L LW | 3 |
| VJ 158 | L LW | R LW | L LW | R LW | 4 |
| VJ 163 | R LW | L LW | R LW | L LW | 4 |
| VJ 159 | L LW | R LW | L LW | L HG | 3 |
| VJ 155 | R LW | R HG | R LW | R HG | 2 |
| VJ 160 | R HG | R LW | L LW | L HG | 2 |
| VJ 153 | R LW | R HG | R LW | R HG | 2 |
| VJ 190 | R HG | R LW | R HG | R LW | 2 |
| VJ 161 | R LW | R HG | R LW | R HG | 2 |
| VJ 156 | R HG | R LW | R HG | L HG | 1 |
| VJ 154 | L HG | L LW | L HG | L LW | 2 |
| VJ 151 | R HG | R LW | R HG | R LW | 2 |
| VJ 162 | L HG | L LW | L HG | L LW | 2 |
| VJ 165 | R HG | R LW | R HG | R LW | 2 |
| VJ 152 | R LW | L LW | L HG | L LW | 3 |
| VJ 164 | L LW | R LW | R HG | R LW | 3 |
| VJ 169 | R LW | L LW | R LW | R HG | 3 |
| VJ 172 | L LW | R LW | R HG | L HG | 2 |
| VJ 166 | L HG | L LW | L HG | L LW | 2 |
| VJ 167 | R HG | R LW | R HG | R LW | 2 |
| VJ 168 | L HG | R HG | R LW | R HG | 1 |

## Table S17. Fixed effects estimates from the generalized linear mixed-effects model (GLMM) analysing male orientation responses in Experiment 2. The response variable was whether a male chose the low-oestradiol female cue (0) or the high-oestradiol female cue (1). Male identity was included as a random intercept to account for repeated measures. The model was fitted with binomial error distribution and logit link. Model fit statistics: deviance = 114.1, log-likelihood = -57.05, df = 2, AIC = 118.1, BIC = 123.0. The variance associated with the random intercept was estimated as zero, indicating negligible among-male variance under this parameterization.

| **Term** | **Estimate (β)** | **SE** | **t** | **p** |
| --- | --- | --- | --- | --- |
| Intercept | 0.336 | 0.221 | 1.520 | 0.128 |

## Table S18. Likelihood ratio tests for fixed effects in the generalized linear mixed-effects model (GLMM) analysing male orientation responses in Experiment 2. Results are from a generalized linear mixed-effects model with binomial family and logit link. Male identity was included as a random intercept. Fixed effects were tested using likelihood ratio tests. Model fit statistics: deviance = 107.3, log-likelihood = -53.63, df = 5, AIC = 117.3, BIC = 129.4. The variance associated with the random intercept for male identity was estimated as zero in the final model, indicating that repeated measures contributed negligible additional variance under this parameterization.

| **Effect** | **χ²** | **df** | **p** |
| --- | --- | --- | --- |
| Intercept | 2.778 | 1 | 0.096 |
| Trial | 6.843 | 3 | 0.077 |
